# Supplementary material for: Improving selective targeting to macrophage subpopulations through modifying liposomes with arginine based materials
Source: Royal Society of Chemistry journal article supplement (doi:10.1039/c6ib00133e), 2016-11-07
Supplement: c6ib00133e1.pdf [file c6ib00133e1.pdf]

**Supplementary Material**

**Improving selective targeting to macrophage  
subpopulations through modifying liposomes with  
arginine based materials**

*Lilusi Ma,<sup>1</sup> Hannah Bygd,<sup>1,+</sup> Kaitlin M. Bratlie<sup>1,2,3,\*</sup>*

<sup>1</sup>Department of Materials Science & Engineering, Iowa State University, Ames, Iowa 50011

<sup>2</sup>Department of Chemical & Biological Engineering, Iowa State University, Ames, Iowa 50011

<sup>3</sup>Division of Materials Science & Engineering, Ames National Laboratory, Ames, Iowa 50011

**Table S1.** Connecting letters report for zeta potential for modified liposomes.

| Material |   |   |   |   |   |   |   |
|----------|---|---|---|---|---|---|---|
| D        | A |   |   |   |   |   |   |
| C        | A |   |   |   |   |   |   |
| B        | A |   |   |   |   |   |   |
| E        |   | B |   |   |   |   |   |
| K        |   | B | C |   |   |   |   |
| J        |   |   | C | D |   |   |   |
| N        |   |   | C | D |   |   |   |
| A        |   |   | C | D |   |   |   |
| M        |   |   | C | D | E |   |   |
| L        |   |   | C | D | E |   |   |
| UM       |   |   | C | D | E |   |   |
| H        |   |   |   | D | E |   |   |
| G        |   |   |   |   | E |   |   |
| F        |   |   |   |   |   | F |   |
| I        |   |   |   |   |   |   | G |

Levels not connected by the same letter are significantly different ( $p < 0.05$ )

**Table S2.** Connecting letters report for diameter for modified liposomes.

| Material |   |   |   |
|----------|---|---|---|
| H        | A |   |   |
| N        | A | B |   |
| L        | A | B |   |
| I        | A | B |   |
| K        | A | B |   |
| J        | A | B |   |
| M        | A | B | C |
| A        | A | B | C |
| UM       | A | B | C |
| G        | A | B | C |
| B        | A | B | C |
| C        | A | B | C |
| F        |   | B | C |
| E        |   | B | C |
| D        |   |   | C |

Levels not connected by the same letter are significantly different ( $p < 0.05$ )

**Table S3.** Connecting letters report for cumulative release at 144 h.

| Material |   |   |   |
|----------|---|---|---|
| G        | A |   |   |
| B        | A |   |   |
| A        | A | B |   |
| J        | A | B |   |
| UM       | A | B | C |
| C        | A | B | C |
| K        | A | B | C |
| I        | A | B | C |
| M        | A | B | C |
| L        | A | B | C |
| N        |   | B | C |
| H        |   | B | C |
| E        |   | B | C |
| D        |   |   | C |
| F        |   |   | D |

Levels not connected by the same letter are significantly different ( $p < 0.05$ )

**Table S4.** Connecting letters report for internalization at 37°C in M(LPS) macrophages.

| Material |   |
|----------|---|
| N        | A |
| M        | A |
| H        | A |
| I        | A |
| L        | B |
| G        | B |
| UM       | B |
| F        | B |
| B        | B |
| J        | B |
| C        | B |
| K        | B |
| A        | B |
| E        | B |
| D        | B |

Levels not connected by the same letter are significantly different ( $p < 0.05$ )

**Table S5.** Connecting letters report for internalization at 37°C in M(IL-4) macrophages.

| Material |   |   |   |
|----------|---|---|---|
| I        | A |   |   |
| H        | A |   |   |
| J        | A |   |   |
| N        |   | B |   |
| M        |   | B |   |
| F        |   | B |   |
| G        |   | B |   |
| K        |   |   | C |
| B        |   |   | D |
| L        |   |   | D |
| E        |   |   | D |
| UM       |   |   | D |
| D        |   |   | D |
| C        |   |   | D |
| A        |   |   | D |

Levels not connected by the same letter are significantly different ( $p < 0.05$ )

**Table S6.** Connecting letters report for internalization at 37°C in M(0) macrophages.

| Material |       |
|----------|-------|
| N        | A     |
| B        | B     |
| J        | C     |
| I        | C D   |
| L        | C D E |
| E        | C D E |
| F        | D E   |
| C        | E F   |
| K        | F G   |
| D        | F G   |
| UM       | G     |
| G        | G     |
| A        | G     |
| H        | G     |
| M        | G     |

Levels not connected by the same letter are significantly different ( $p < 0.05$ )

**Table S7.** Connecting letters report for internalization at 4°C in M(LPS) macrophages.

| Material |   |   |   |
|----------|---|---|---|
| J        | A |   |   |
| F        | A | B |   |
| G        | A | B |   |
| I        | A | B | C |
| N        |   | B |   |
| H        |   | B |   |
| K        |   | B | C |
| E        |   | B | C |
| C        |   | B | C |
| D        |   | B | C |
| B        |   | B | C |
| A        |   | B | C |
| UM       |   |   | C |
| M        |   |   | C |
| L        |   |   | C |

Levels not connected by the same letter are significantly different ( $p < 0.05$ )



**Table S8.** Connecting letters report for internalization at 4°C in M(IL-4) macrophages.

| Material |   |   |   |   |
|----------|---|---|---|---|
| J        | A |   |   |   |
| I        | A | B |   |   |
| H        | A | B | C |   |
| G        |   | B | C | D |
| K        |   | B | C | D |
| N        |   | B | C | D |
| E        |   |   | C | D |
| F        |   |   | C | D |
| C        |   |   | C | D |
| D        |   |   | C | D |
| B        |   |   | C | D |
| UM       |   |   | C | D |
| M        |   |   | C | D |
| A        |   |   |   | D |
| L        |   |   |   | E |

Levels not connected by the same letter are significantly different ( $p < 0.05$ )

**Table S9.** Connecting letters report for internalization at 4°C in M(0) macrophages.

| Material |   |   |   |   |
|----------|---|---|---|---|
| C        | A |   |   |   |
| A        | A |   |   |   |
| B        |   | B |   |   |
| I        |   | B | C |   |
| UM       |   | B | C |   |
| G        |   |   | C | D |
| F        |   |   | C | D |
| N        |   |   |   | D |
| D        |   |   |   | D |
| H        |   |   |   | D |
| E        |   |   |   | D |
| M        |   |   |   | D |
| J        |   |   |   | D |
| K        |   |   |   | E |
| L        |   |   |   | E |

Levels not connected by the same letter are significantly different ( $p < 0.05$ )

**Table S10.** Connecting letters report for IC<sub>50</sub> of doxorubicin free and encapsulated in liposomes for M(LPS) macrophages.

| Material         |   |   |   |
|------------------|---|---|---|
| A                | A |   |   |
| L                | A |   |   |
| D                | A |   |   |
| K                | A | B |   |
| E                | A | B |   |
| B                | A | B |   |
| F                | A | B |   |
| C                | A | B |   |
| M                |   | B |   |
| Free doxorubicin |   | C |   |
| J                |   |   | D |
| N                |   |   | D |
| H                |   |   | D |
| I                |   |   | D |
| UM               |   |   | D |
| G                |   |   | E |

Levels not connected by the same letter are significantly different (p<0.05)

**Table S11.** Connecting letters report for IC<sub>50</sub> of doxorubicin free and encapsulated in liposomes for M(IL-4) macrophages.

| Material         |   |
|------------------|---|
| C                | A |
| B                | B |
| A                | B |
| UM               | B |
| D                | C |
| Free doxorubicin | C |
| M                | D |
| J                | D |
| N                | D |
| F                | E |
| G                | F |
| L                | F |
| K                | F |
| E                | G |
| I                | G |
| H                | G |

Levels not connected by the same letter are significantly different (p<0.05)

**Table S12.** Connecting letters report for IC<sub>50</sub> of doxorubicin free and encapsulated in liposomes for M(0) macrophages.

| Material         |     |
|------------------|-----|
| Free doxorubicin | A   |
| UM               | A   |
| N                | A   |
| A                | B   |
| J                | C   |
| H                | C   |
| L                | C   |
| M                | D   |
| F                | E   |
| G                | E   |
| C                | E F |
| E                | E F |
| I                | E F |
| B                | E F |
| D                | E F |
| K                | F   |

Levels not connected by the same letter are significantly different (p<0.05)
